# Supplementary material for: The human Vδ2+ T-cell compartment comprises distinct innate-like Vγ9+ and adaptive Vγ9- subsets
Source: PubMed Central journal article supplement (PMC5932074; doi:10.1038/s41467-018-04076-0), 2018-05-02
Supplement: 41467_2018_4076_MOESM1_ESM.pdf [file 41467_2018_4076_MOESM1_ESM.pdf]

# **The human V $\delta$ 2<sup>+</sup> T cell compartment comprises distinct innate-like V $\gamma$ 9<sup>+</sup> and adaptive V $\gamma$ 9<sup>-</sup> subsets**

Martin S. Davey, Carrie R. Willcox, Stuart Hunter, Sofya A. Kasatskaya, Ester B. Remmerswaal, Mahboob Salim, Fiyaz Mohammed, Frederike J. Bemelman, Dmitriy M. Chudakov, Ye H. Oo and Benjamin E. Willcox

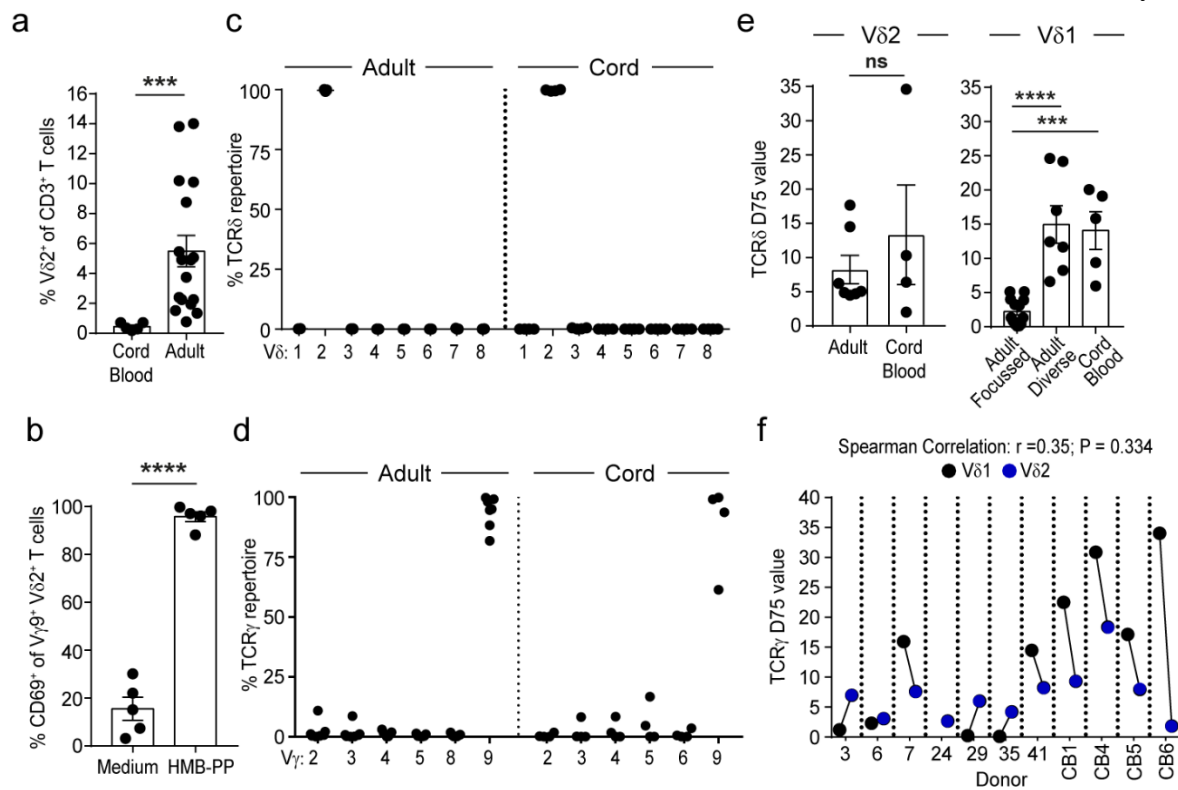

**Supplementary Figure 1. Profiling of V $\delta$ <sup>2+</sup> T cells and TCR repertoires in adults and neonates.** (a) Frequency of V $\delta$ <sup>2+</sup> cells in CD3<sup>+</sup> T cells from cord blood samples (n=5) and adult peripheral blood (n=18). (b) Frequency of CD69<sup>+</sup> V $\gamma$ 9<sup>+</sup> V $\delta$ <sup>2+</sup> T cells from PBMC cultured in the presence of medium or 10 nM HMB-PP for 18 hours (n=5). (c) V $\delta$ , (d) V $\gamma$  usage in V $\delta$ <sup>2+</sup> TCR repertoires from adult peripheral blood (n=7) and cord blood samples (n=4). (e) Comparison of TCR $\delta$  D75 metrics from V $\delta$ <sup>2+</sup> T cells from adult peripheral blood, cord blood samples (adult: n=7; cord blood: n=4) and V $\delta$ <sup>1+</sup> TCR repertoires (adult focussed: n=13; adult diverse: n=7; cord blood: n=5). (f) Comparison of TCR $\gamma$  D75 metrics from paired V $\delta$ <sup>2+</sup> and V $\delta$ <sup>1+</sup> TCR repertoires from the same adult peripheral blood and cord blood samples. Adult donor 24 had no matched V $\delta$ <sup>1+</sup> TCR repertoire data. Error bars indicate means  $\pm$  SEM; \* P < 0.05; \*\*\* P < 0.001; \*\*\*\* P < 0.0001; p-values were determined by Mann-Whitney t-test (a and e); Student's t-test (b) and One-way ANOVA with Tukey's post hoc testing (e).

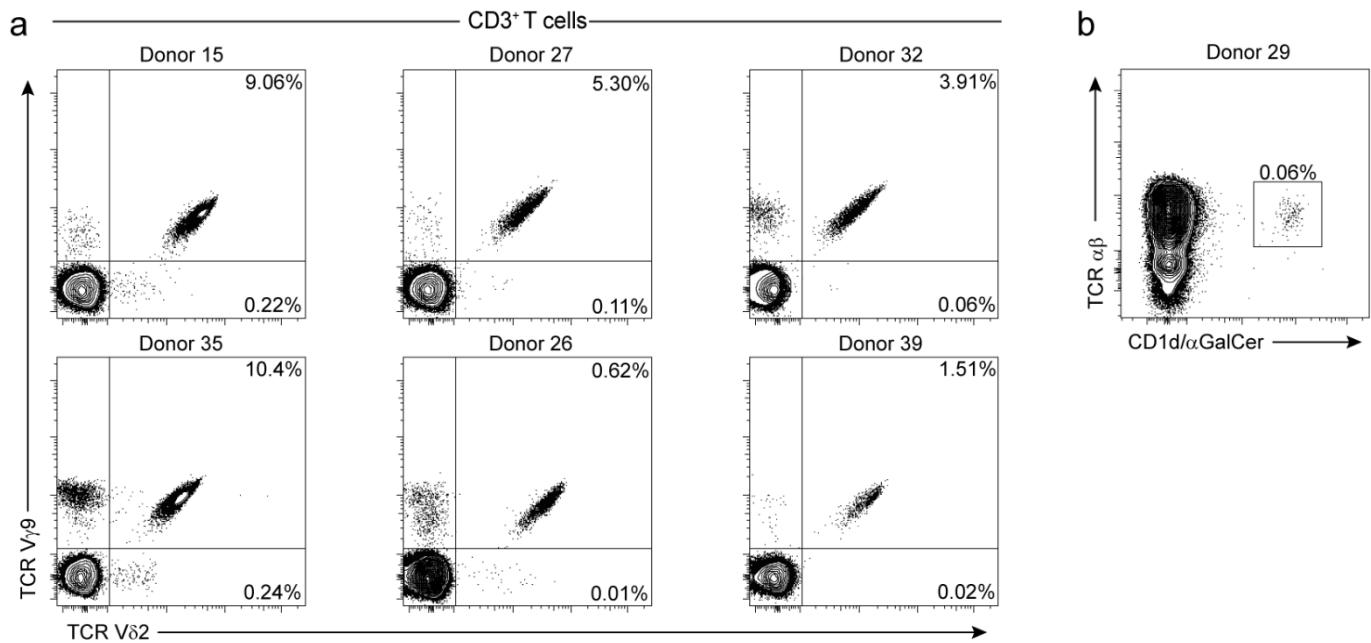

**Supplementary Figure 2. Identification of V $\gamma$ 9<sup>+</sup> V $\delta$ 2<sup>+</sup> T cells and NKT cells in healthy adults.** (a) Representative identification of V $\gamma$ 9<sup>+</sup> V $\delta$ 2<sup>+</sup> T cells by monoclonal antibodies directed against TCR V $\gamma$ 9 and TCR V $\delta$ 2 in CD3<sup>+</sup> T cells from adult peripheral blood samples (n=18). (b) Representative identification of NKT cells with an  $\alpha$ GalCer loaded CD1d-dextramer in CD3<sup>+</sup> T cells from adult peripheral blood samples (n=5).

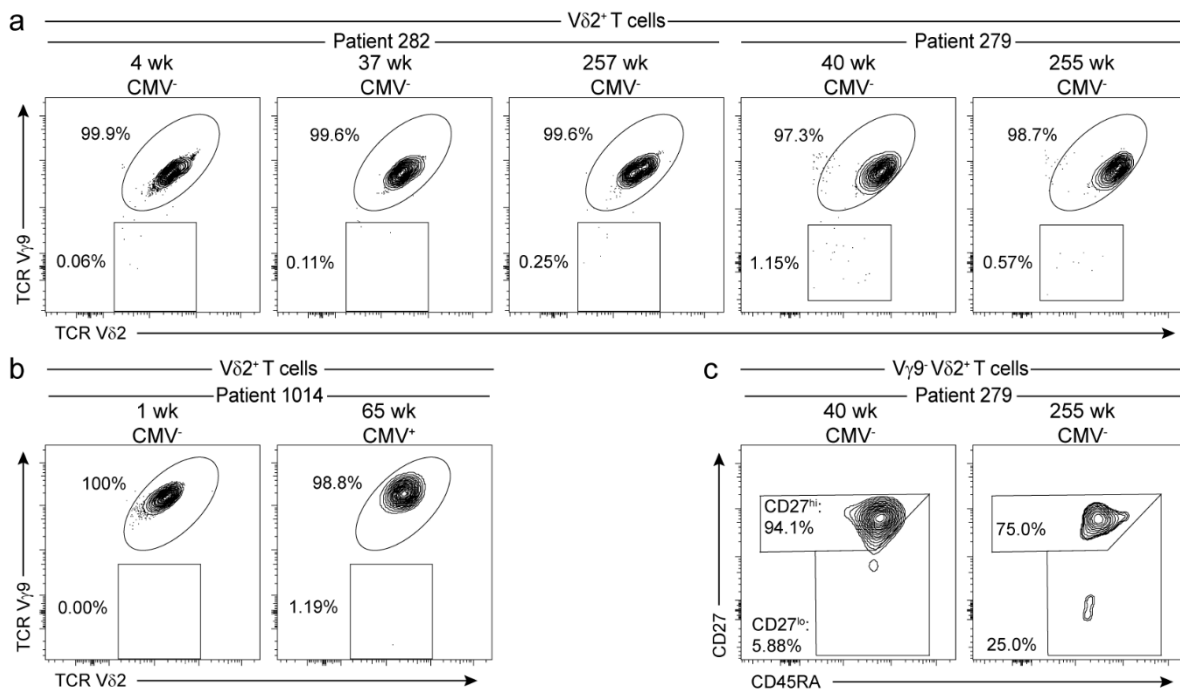

**Supplementary Figure 3.  $V\gamma 9^+ V\delta 2^+$  T cells in kidney transplant patients.** (a) Identification of  $V\gamma 9^+$  cells within total  $V\delta 2^+$  T cells in two CMV-seronegative kidney transplant patients who did not develop post-operative acute-CMV infection and (b) a patient who was infected with CMV and seroconverted at 5 weeks post-transplantation. (c) Analysis of CD27 and CD45RA T cell memory marker expression on detectable  $V\gamma 9^+ V\delta 2^+$  T cells populations from CMV-seronegative patient 279 at 40 and 255 weeks post-kidney transplant.

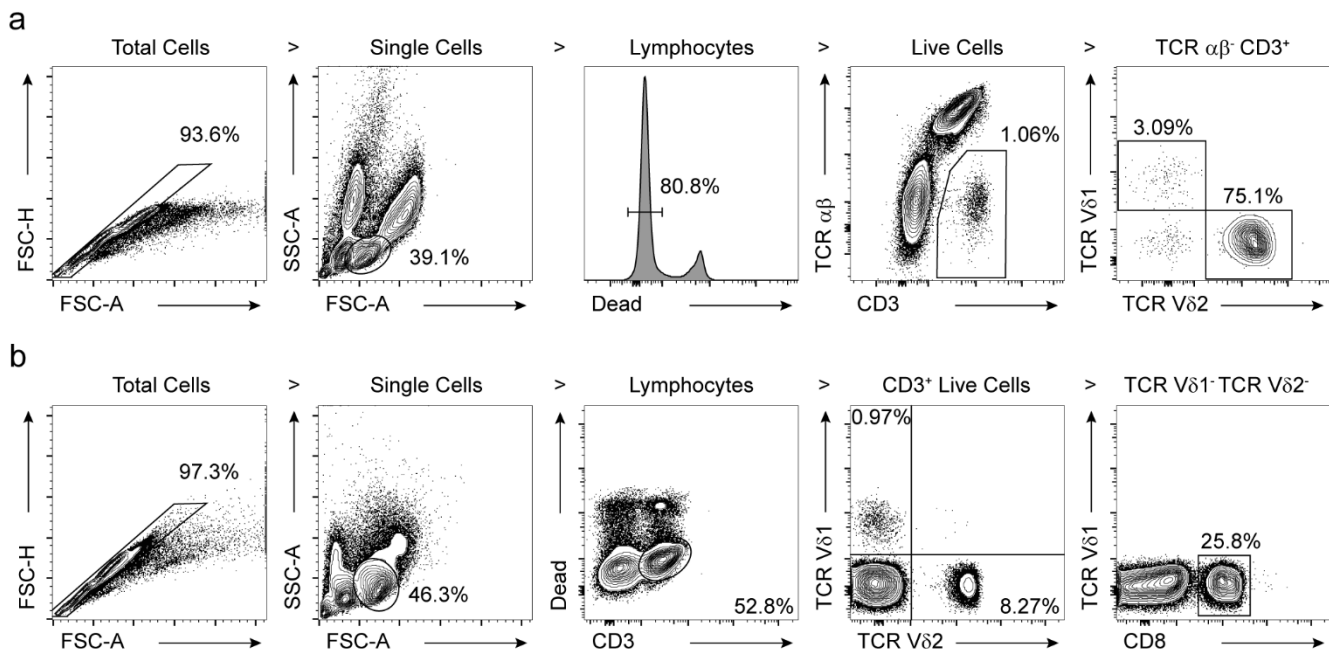

**Supplementary Figure 4. Gating strategy for identification and sorting of T cell populations.** (a) Representative flow cytometry plots show the gating strategy used to identify single cells>lymphocytes>live cells>CD3<sup>+</sup> TCR  $\alpha\beta$ <sup>-</sup> T cells>V $\delta$ 2<sup>+</sup> populations for cell sorting (related to Figure 1, 2 and Supplementary Figure 1). (b) Representative identification of single cells>lymphocytes>live cells CD3<sup>+</sup>>V $\delta$ 1<sup>+</sup>, V $\delta$ 2<sup>+</sup> and V $\delta$ 1<sup>-</sup> V $\delta$ 2<sup>-</sup> CD8<sup>+</sup> T cells from peripheral blood and liver tissue samples (related to Figure 2, 3, 4, 5, 6, Supplementary Figure 2 and 3).

| <b>Cord Blood 1</b> | <b>%</b> | <b>Cord Blood 4</b> | <b>%</b> | <b>Cord Blood 5</b> | <b>%</b> | <b>Cord Blood 6</b>     | <b>%</b> |
|---------------------|----------|---------------------|----------|---------------------|----------|-------------------------|----------|
| CACDWGSSWDTRQMFF    | 6.2      | CACDWGSSWDTRQMFF    | 8.2      | CACDILGDTDKLIF      | 5.4      | CACDSLGDTSPPDKLIF       | 11.6     |
| CACDILGDTDKLIF      | 3.1      | CACDTGGYSWDTRQMFF   | 3.4      | CACDKLGDTDKLIF      | 4.1      | CACDRGIRRSWDTRQMFF      | 10.4     |
| CACDVLGDTDKLIF      | 1.5      | CACDILGDTDKLIF      | 1.9      | CACDTVLGDTWDTRQMFF  | 3.0      | CACDGKSTSSWDTRQMFF      | 9.7      |
| CACDVLGDTAQLFF      | 1.5      | CACDTVLGDTWDTRQMFF  | 1.4      | CACDWGSSWDTRQMFF    | 2.5      | CACDTVYWGIRSSWDTRQMFF   | 9.7      |
| CACDRGYTDKLIF       | 1.2      | CACDVLGDTDKLIF      | 1.3      | CACDVLGDRHDKLIF     | 2.2      | CACDSLGDTSPPDKLIF       | 9.7      |
| CACDVLGDLTAQLFF     | 1.1      | CACDYWGSSWDTRQMFF   | 1.1      | CACDVLGDTDKLIF      | 2.1      | CACDTGGRWGIRLWDTRQMFF   | 9.1      |
| CACDGILTAQLFF       | 0.9      | CACDTWGSSWDTRQMFF   | 0.9      | CACDNTGGSSWDTRQMFF  | 1.8      | CACDTATPLESGGYEVGTDKLIF | 7.5      |
| CACDTWGYTDKLIF      | 0.9      | CACDILGDTWDTRQMFF   | 0.6      | CACDTVIGGIRPYTDKLIF | 1.7      | CACDTGKWDTRQMFF         | 7.3      |
| CACDSGIWTAQLFF      | 0.9      | CACDWGTWDTRQMFF     | 0.6      | CACDTGGYWDTRQMFF    | 1.6      | CACDTGDTLWDTRQMFF       | 3.8      |
| CACDILGDTWDTRQMFF   | 0.8      | CACDTWGTDKLIF       | 0.6      | CACDTLGVLTKLIF      | 1.5      | CACDTGWSSWDTRQMFF       | 3.3      |

**Supplementary Table 1. Top 10 most prevalent TCR $\delta$  sequences in cord blood V $\delta$ 2<sup>+</sup> T cells.** The table depicts CDR3 $\delta$ 2 amino acid sequence and frequency occupied in the total TCR $\delta$  repertoire from four cord blood donors.

| CDR3 $\delta$ 2    | CDR3 length | TRDD | TRDJ | P nt | N nt | CB01 | CB04 | CB05 | CB06 | Frequency |
|--------------------|-------------|------|------|------|------|------|------|------|------|-----------|
| CACDWGSSWDTRQMFF   | 14          | 3    | 3    | 1    | 0    |      |      |      |      | >5%       |
| CACDTAGGYSWDTRQMFF | 16          | 3    | 3    | 1    | 0    |      |      |      |      | 2.5-5%    |
| CACDTWDTRQMFF      | 11          | --   | 3    | 0    | 0    |      |      |      |      | 1-2.5%    |
| CACDWGTWDTRQMFF    | 13          | 3    | 3    | 0    | 0    |      |      |      |      | <1%       |
| CACDTGDTLWDTRQMFF  | 15          | 3    | 3    | 1    | 1    |      |      |      |      | ND        |
| CACDTVLGDTWDTRQMFF | 16          | 3    | 3    | 2    | 0    |      |      |      |      |           |
| CACDNTGGSSWDTRQMFF | 15          | 3    | 3    | 1    | 1    |      |      |      |      |           |
| CACDTGGYWDTRQMFF   | 14          | 3    | 3    | 0    | 0    |      |      |      |      |           |
| CACDTWGSSWDTRQMFF  | 15          | 3    | 3    | 1    | 0    |      |      |      |      |           |
| CACDYWGSSWDTRQMFF  | 15          | 3    | 3    | 2    | 0    |      |      |      |      |           |
| CACDTGGYSWDTRQMFF  | 15          | 3    | 3    | 0    | 0    |      |      |      |      |           |
| CACDTAGGSSWDTRQMFF | 15          | 3    | 3    | 1    | 0    |      |      |      |      |           |
| CACDTAGSSWDTRQMFF  | 15          | 3    | 3    | 2    | 1    |      |      |      |      |           |
| CACDTVGGSSWDTRQMFF | 16          | 3    | 3    | 3    | 2    |      |      |      |      |           |
| CACDTYWGSSWDTRQMFF | 16          | 3    | 3    | 2    | 0    |      |      |      |      |           |
| CACDTGGYSSWDTRQMFF | 16          | 3    | 3    | 2    | 0    |      |      |      |      |           |
| CACDILGDTDKLIF     | 12          | 3    | 1    | 1    | 0    |      |      |      |      |           |
| CACDVLGDTDKLIF     | 12          | 3    | 1    | 2    | 0    |      |      |      |      |           |
| CACDTLGDTDKLIF     | 12          | 3    | 1    | 0    | 0    |      |      |      |      |           |

**Supplementary Table 2. Shared TCR $\delta$  sequences in cord blood V $\delta$ 2<sup>+</sup> T cells.** The table depicts public CDR3 $\delta$ 2 sequences, amino acid length, D $\delta$ , and J $\delta$  gene segments used, N-nucleotide, P-nucleotide addition and relative frequency within each TCR $\delta$  repertoire. Sequences were analysed using IMGT Junction Analysis and are from four cord blood donors. ND = not detected.
